# Supplementary material
Source: HighWire-hosted journal article supplement (https://www.annfammed.org/highwire/filestream/26716/field_highwire_adjunct_files/0/Munroe_visual_abstract-revised.pdf)
Supplement: Munroe_visual_abstract-revised.pdf [file Munroe_visual_abstract-revised.pdf]

# Impact of Financial Incentives and Department Size on Scholarly Activity Output

This study surveyed family medicine department chairs across the U.S. and Canada using a Council of Academic Family Medicine Educational Research Alliance (CERA) questionnaire.

## Financial Incentives

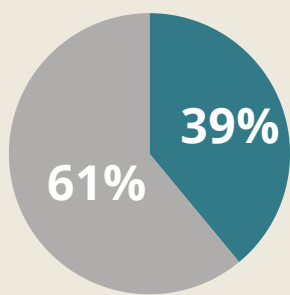

Respondents reported financial incentives at 41 of 106 institutions (39%).

For the departments that offered financial incentives for scholarly activity, 19 (17.9%) offered cash-based incentives to clinical faculty, and 34 (32.1%) provided noncash incentives. Financial incentives were not statistically associated with scholarly output.

## Department Size

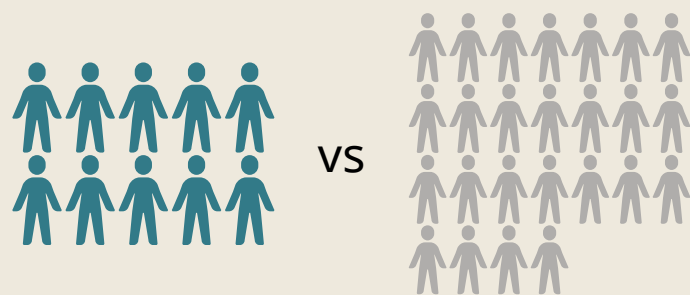

Faculty size was statistically significant: departments with fewer than 25 full-time faculty were less likely to produce six or more presentations.

*Source:* Munroe DD, Villalon-Gomez J, Seehusen DA, Moore MA. Impact of financial incentives and department size on scholarly activity output. *Ann Fam Med*. 2025;23:10.1370/afm.240061
